# Supplementary material for: Differences in Treatment Modalities and Prognosis of Elderly Patients with Ovarian Cancer: A Two-Center Propensity Score-Matched Study
Source: MDPI journal article supplement (doi:10.3390/cancers14153655), 2022-07-27
Supplement: s1 [file s1]

Supplementary Materials

# Differences in Treatment Modalities and Prognosis of Elderly Patients with Ovarian Cancer: A Two-Center Propensity Score-Matched Study

Yuxi Zhao, Jing Zuo, Ning Li, Rongshou Zheng, Guanwen Yuan, Guihua Shen\* and Lingying Wu\*

Table S1. Univariate analysis and multivariate analysis of PFS.

| Characteristics |             | The Original Cohort        |              |                            |              | The Cohort after PSM       |              |                     |              |
|-----------------|-------------|----------------------------|--------------|----------------------------|--------------|----------------------------|--------------|---------------------|--------------|
|                 |             | Univariate                 |              | Multivariate               |              | Univariate                 |              | Multivariate        |              |
|                 |             | OR (95% CI)                | <i>p</i>     | OR (95% CI)                | <i>p</i>     | OR (95% CI)                | <i>p</i>     | OR (95% CI)         | <i>p</i>     |
| Age             | <70         | <b>1</b>                   | <b>0.068</b> | <b>1</b>                   | 0.301        | <b>1</b>                   | 0.850        | <b>1</b>            | 0.741        |
|                 | ≥70         | <b>1.256 (0.985–1.603)</b> |              | 1.174 (0.866–1.591)        |              | 0.969 (0.698–1.345)        |              | 1.096 (0.771–1.558) |              |
| CCI             | 3–4         | <b>1</b>                   | <b>0.011</b> | <b>1</b>                   | <b>0.012</b> | <b>1</b>                   | <b>0.008</b> | <b>1</b>            | 0.120        |
|                 | ≥5          | <b>1.705 (1.128–2.577)</b> |              | <b>2.899 (1.259–6.667)</b> |              | <b>2.172 (1.221–3.865)</b> |              | 0.219 (0.032–1.487) |              |
| CARG            | Low risk    | <b>1</b>                   | <b>0.021</b> | <b>1</b>                   | 0.341        | <b>1</b>                   | 0.304        |                     |              |
|                 | Medium risk | <b>1.327 (1.044–1.687)</b> |              | 1.146 (0.866–1.516)        |              | 1.188 (0.855–1.651)        |              |                     |              |
| ASA             | 1           | <b>1</b>                   |              |                            |              | <b>1</b>                   |              |                     |              |
|                 | 2           | 1.288 (0.755–2.195)        | 0.353        |                            |              | 0.872 (0.447–1.701)        | 0.688        |                     |              |
|                 | 3           | 0.859 (0.636–1.160)        | 0.321        |                            |              | 0.739 (0.480–1.139)        | 0.170        |                     |              |
| NAC             | No          | <b>1</b>                   | <b>0.001</b> | <b>1</b>                   | <b>0.040</b> | <b>1</b>                   | 0.408        |                     |              |
|                 | Yes         | <b>1.509 (1.183–1.924)</b> |              | <b>1.388 (1.015–1.897)</b> |              | 1.152 (0.824–1.608)        |              |                     |              |
| Renal function  | <60         | <b>1</b>                   | 0.881        |                            |              | <b>1</b>                   | 0.064        |                     |              |
|                 | >60         | 0.973 (0.681–1.391)        |              |                            |              | 0.582 (0.329–1.031)        |              |                     |              |
| Hb              | ≥100        | <b>1</b>                   | 0.056        |                            |              | <b>1</b>                   | 0.502        |                     |              |
|                 | <100        | 1.166 (0.996–1.366)        |              |                            |              | 1.093 (0.843–1.417)        |              |                     |              |
| Alb             | <40         | <b>1</b>                   | 0.269        |                            |              | <b>1</b>                   | 0.828        |                     |              |
|                 | ≥40         | 1.154 (0.895–1.487)        |              |                            |              | 1.039 (0.737–1.465)        |              |                     |              |
| SCS             | 1           | <b>1</b>                   | 0.189        |                            |              | <b>1</b>                   | 0.976        |                     |              |
|                 | 2–3         | 0.829 (0.626–1.097)        |              |                            |              | 0.994 (0.673–1.469)        |              |                     |              |
| Ascites         | <200        | <b>1</b>                   | <b>0.001</b> | <b>1</b>                   | 0.115        | <b>1</b>                   | <b>0.001</b> | <b>1</b>            | 0.316        |
|                 | ≥200        | <b>1.553 (1.210–1.993)</b> |              | 1.236 (0.923–1.655)        |              | <b>1.809 (1.281–2.556)</b> |              | 1.215 (0.830–1.779) |              |
| TD              | LTD         | <b>1</b>                   | <0.001       | <b>1</b>                   | <b>0.036</b> | <b>1</b>                   | <0.001       | <b>1</b>            | 0.246        |
|                 | ITD & HTD   | <b>1.533 (1.313–1.790)</b> |              | <b>1.231 (1.014–1.494)</b> |              | <b>1.498 (1.219–1.840)</b> |              | 1.165 (0.900–1.509) |              |
| SLND            | No          | <b>1</b>                   | <0.001       | <b>1</b>                   | 0.208        | <b>1</b>                   | <b>0.012</b> | <b>1</b>            | 0.129        |
|                 | Yes         | <b>0.619 (0.481–0.797)</b> |              | 0.827 (0.615–1.112)        |              | <b>1.570 (1.104–2.237)</b> |              | 0.740 (0.501–1.092) |              |
| R0              | Yes         | <b>1</b>                   | <0.001       | <b>1</b>                   | <0.001       | <b>1</b>                   | <0.001       | <b>1</b>            | <b>0.001</b> |

|            |            |                     |        |                     |       |                     |       |                     |       |
|------------|------------|---------------------|--------|---------------------|-------|---------------------|-------|---------------------|-------|
|            | No         | 2.273 (1.760–2.924) |        | 2.028 (1.506–2.732) |       | 2.421 (1.718–3.413) |       | 2.087 (1.350–3.226) |       |
| FIGO stage | I-II       | 1                   | <0.001 | 1                   | 0.011 | 1                   | 0.001 | 1                   | 0.048 |
|            | III-IV     | 2.311 (1.558–3.426) |        | 2.795 (1.261–6.194) |       | 2.731 (1.535–4.858) |       | 7.051 (1.015–49.01) |       |
| Histology  | HGSC       | 1                   | 0.387  | 1                   | 0.145 | 1                   | 0.563 | 1                   | 0.309 |
|            | Clear cell | 0.883 (0.667–1.170) |        | 1.261 (0.923–1.722) |       | 0.883 (0.579–1.346) |       | 1.281 (0.795–2.064) |       |
| HT         | 0–2        | 1                   | 0.249  | 1                   | 0.357 | 1                   | 0.093 | 1                   | 0.116 |
|            | 3–4        | 0.863 (0.672–1.108) |        | 0.883 (0.677–1.151) |       | 0.741 (0.523–1.051) |       | 0.736 (0.502–1.079) |       |
| CAC        | Yes        | 1                   | 0.002  | 1                   | 0.004 | 1                   | 0.922 | 1                   | 0.049 |
|            | No         | 1.597 (1.183–2.160) |        | 1.634 (1.170–2.283) |       | 1.021 (0.663–1.575) |       | 1.653 (1.001–2.725) |       |

Hb, hemoglobin; Alb, albumin; SLND, systemic lymph node dissection; CAC, completion of adjuvant chemotherapy; HT, hematologic toxicity; TD, tumor dissemination.

Table S2. Demographic information of the cohort after PSM.

| Characteristics      |                | n (%)      | Groups, n (%)   |                 | p Value |
|----------------------|----------------|------------|-----------------|-----------------|---------|
|                      |                |            | Age<70 (n = 81) | Age≥70 (n = 81) |         |
| NAC                  | No             | 73(45.1)   | 37 (45.7)       | 36 (44.4)       | 0.875   |
|                      | Yes            | 89(54.9)   | 44 (54.3)       | 45 (55.6)       |         |
| Renal function       | ≥60            | 143(88.3)  | 71(87.7)        | 72(88.9)        | 0.807   |
|                      | <60            | 19(11.7)   | 10(12.3)        | 9(11.1)         |         |
| Ascites              | <200 ml        | 105(64.8)  | 53 (65.4)       | 52 (64.2)       | 0.869   |
|                      | ≥200 ml        | 57(35.2)   | 28 (34.6)       | 29 (35.8)       |         |
| SCS                  | 1              | 126        | 65 (80.2)       | 61 (75.3)       | 0.450   |
|                      | 2              | 36         | 16 (19.8)       | 20 (24.7)       |         |
|                      | 3              | 0          | 0(0.0)          | 0(0.0)          |         |
| SLND                 | No             | 103(63.6)  | 49 (60.5)       | 54 (66.7)       | 0.414   |
|                      | Yes            | 59(36.4)   | 32 (39.5)       | 27 (33.3)       |         |
| Histology            | HGSC           | 146(90.1)  | 70(86.4)        | 76 (93.8)       | 0.205   |
|                      | EC             | 9(5.6)     | 7 (8.6)         | 2 (2.5)         |         |
|                      | Clear cell     | 7(4.3)     | 4(4.9)          | 3(3.7)          |         |
| R0 cytoreduction     | Yes            | 86 (53.1)  | 43 (53.1)       | 43 (53.1)       | 1.000   |
|                      | No             | 76 (46.9)  | 38 (46.9)       | 38 (46.9)       |         |
| FIGO stage           | I-II           | 21 (13.0)  | 13 (16.0)       | 8 (9.9)         | 0.242   |
|                      | III-IV         | 141 (87.0) | 68 (84.0)       | 73 (90.1)       |         |
| CAC                  | No             | 29 (17.9)  | 16 (19.8)       | 13 (16.0)       | 0.539   |
|                      | Yes            | 133 (82.1) | 65 (80.2)       | 68 (84.0)       |         |
| Chemotherapy regimen | None           | 0 (0.0)    | 0 (0.0)         | 0 (0.0)         | 1.000   |
|                      | monotherapy    | 0 (0.0)    | 0 (0.0)         | 0 (0.0)         |         |
|                      | double therapy | 162 (100)  | 81 (100)        | 81 (100)        |         |

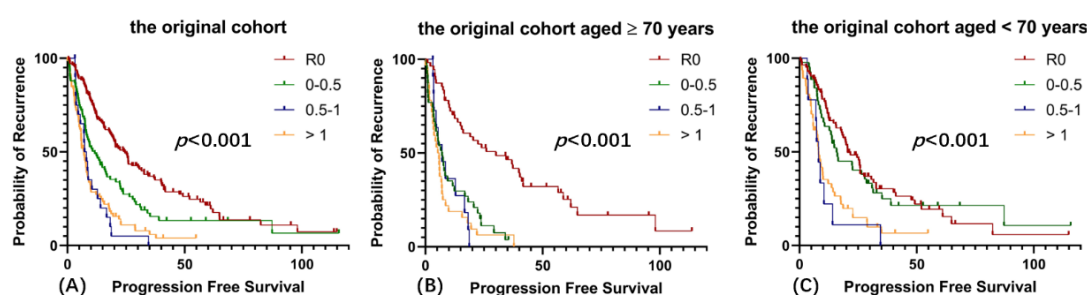

**Figure S1.** Prognostic analysis of residual tumor on PFS. (A) Progression-free survival in the original cohort, (B) Progression-free survival in the Age ≥ 70 group, (C) Progression-free survival in the Age < 70 group.
